# Supplementary material for: One-step-immunoassay of procalcitonin enables rapid and accurate diagnosis of bacterial infection
Source: Royal Society of Chemistry journal article supplement (doi:10.1039/d1ra02494a), 2021-01-01
Supplement: d1ra02494a1.pdf [file d1ra02494a1.pdf]

*Electronic Supplementary Information (ESI)*

## **One-step-immunoassay of procalcitonin enables rapid and accurate diagnosis of bacterial infection**

Jae-Hwan Oh, Jung-Hyuk Kwon, Hye-Hyun Kim, and Jeewon Lee\*

Department of Chemical and Biological Engineering

College of Engineering, Korea University

Anam-Ro 145, Seoul 136-713, Republic of Korea

**\* Corresponding author:**

(Phone) +82-2-3290-3304; (Fax) +82-2-926-6102; (E-mail) [leejw@korea.ac.kr](mailto:leejw@korea.ac.kr)

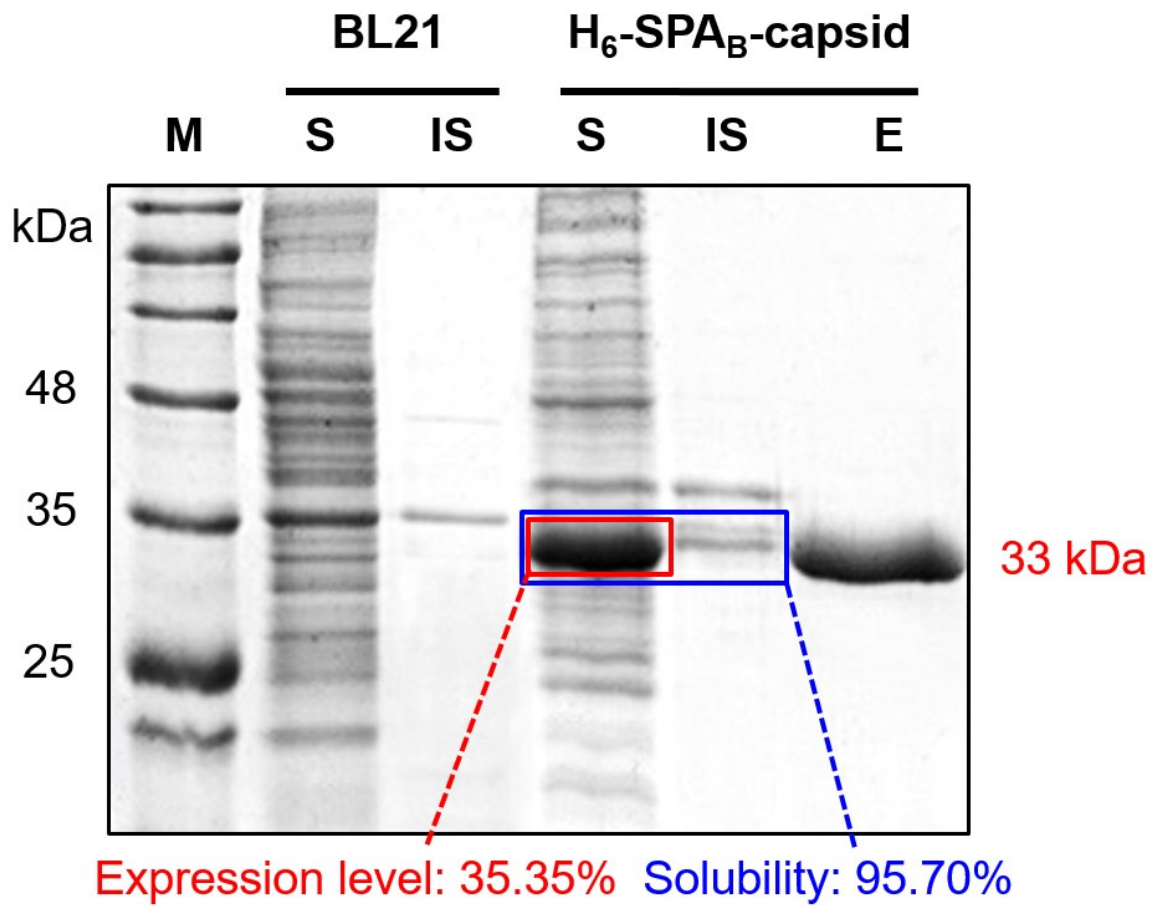

**Fig. S1.** Results of SDS-PAGE analyses of H<sub>6</sub>-SPA<sub>B</sub>-capsid. (M: gangnam protein marker, S and IS: soluble and insoluble fraction, E: purified and eluted protein, BL21: wild-type of *E.coli* strain BL21 (DE3))

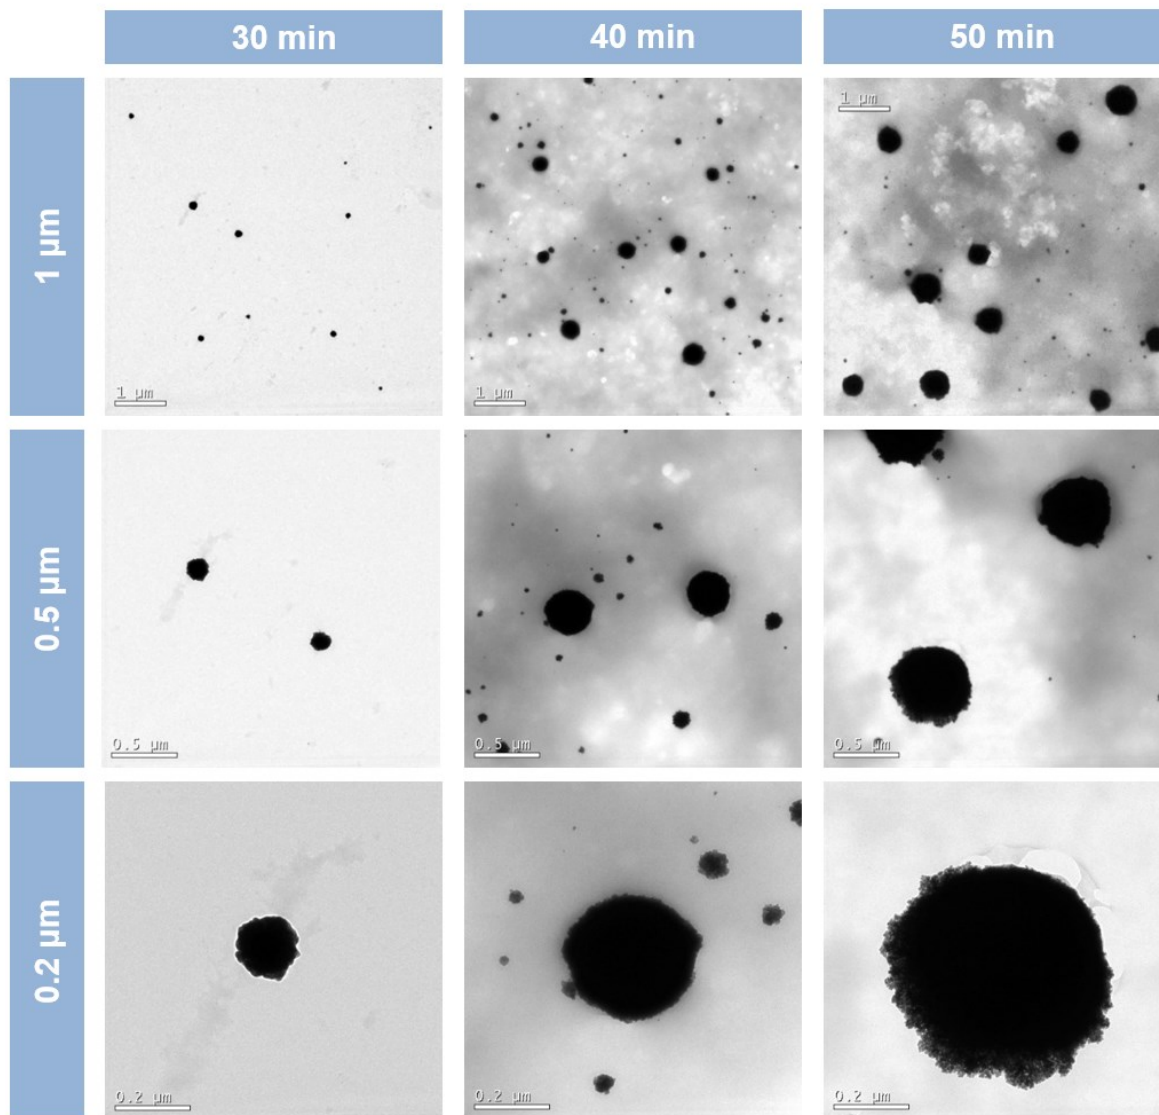

**Fig. S2.** Transmission electron microscope images showing time-course formation of large gold particles in one-step-immunoassay

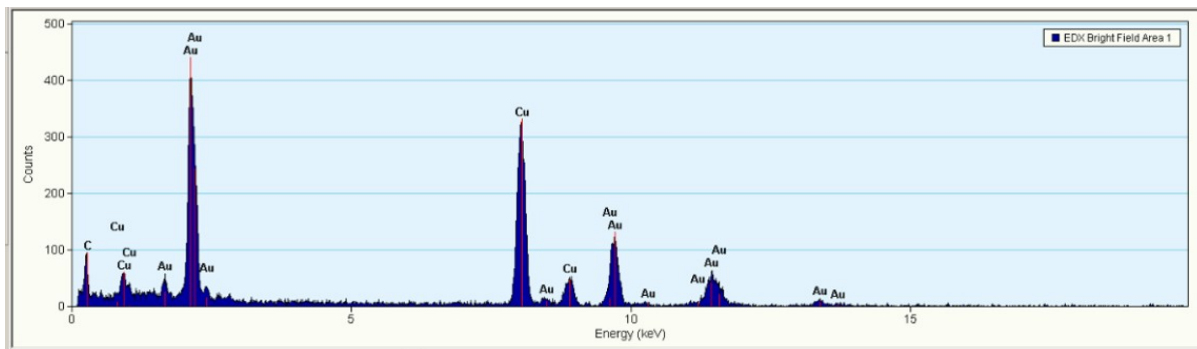

**Fig. S3.** Results of EDX analysis of an one-step-immunoassay solution

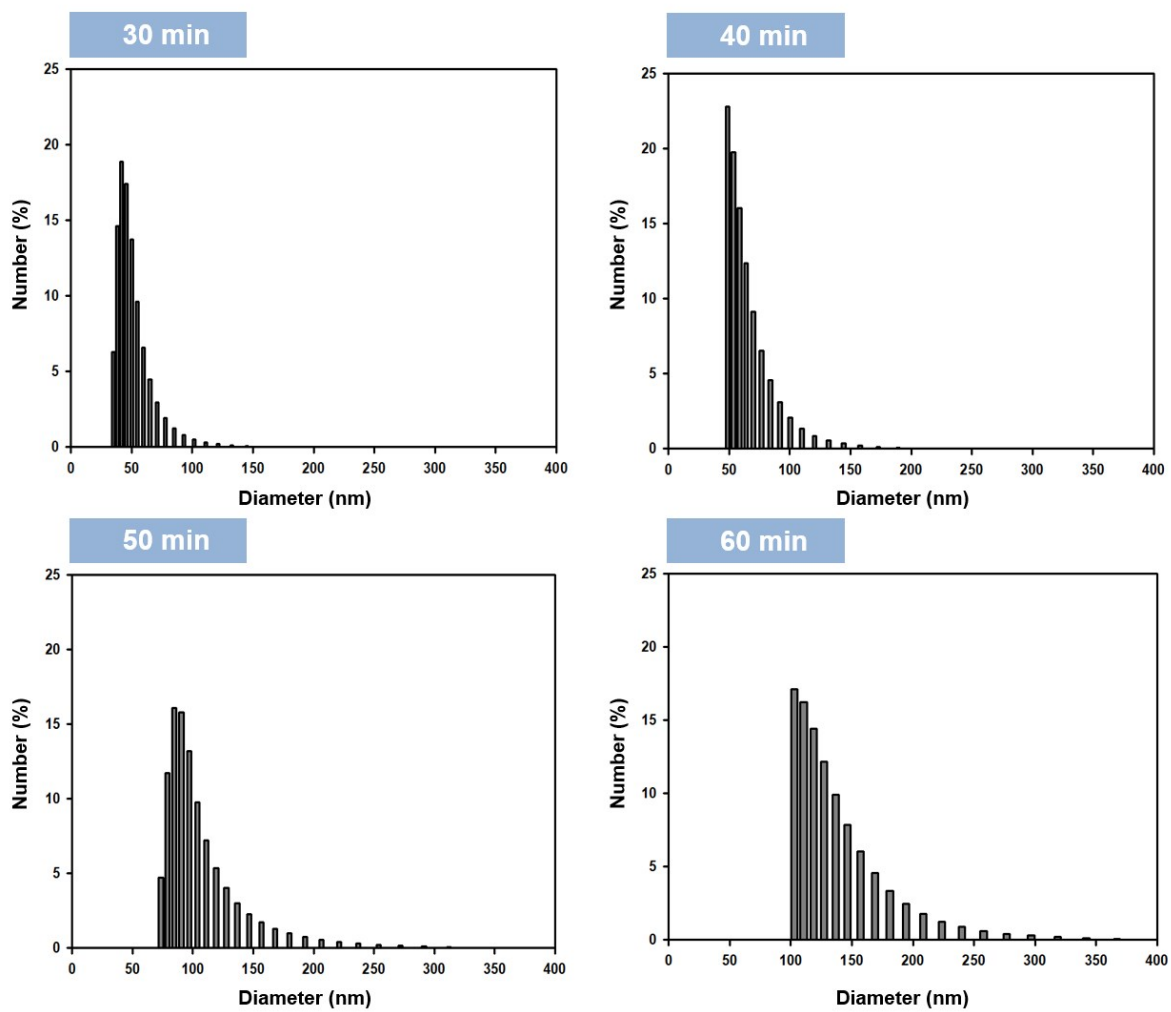

**Fig. S4.** Results of time-course dynamic light scattering analysis of an one-step-immunoassay solution, showing that the size of gold particles increases with time
